# Supplementary material
Source: Springer Nature journal article supplement (https://www.springermedizin.de/resource/supplementary/12985_2009_539_MOESM5_ESM.pdf/9608406)

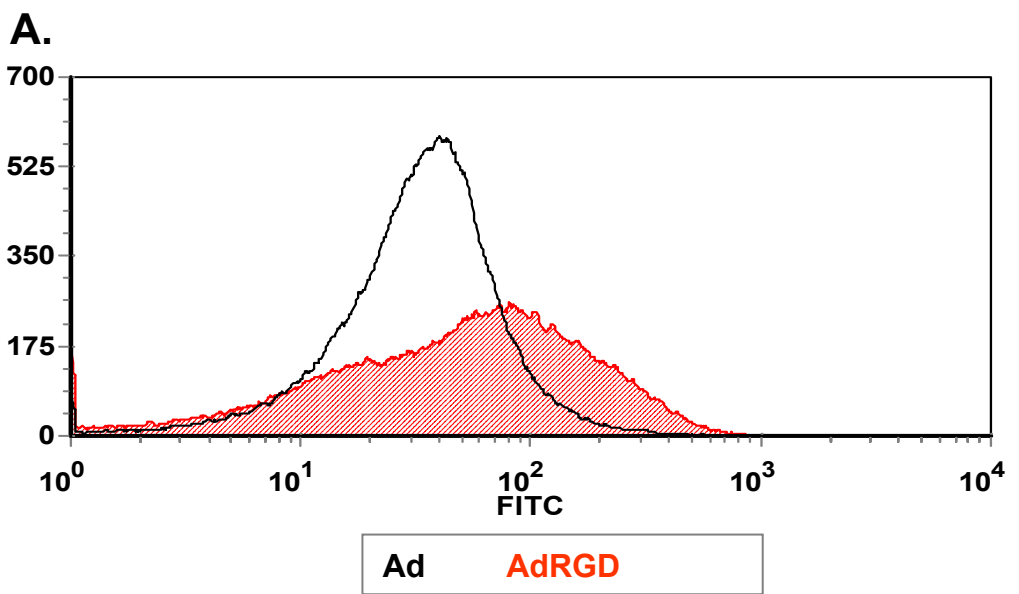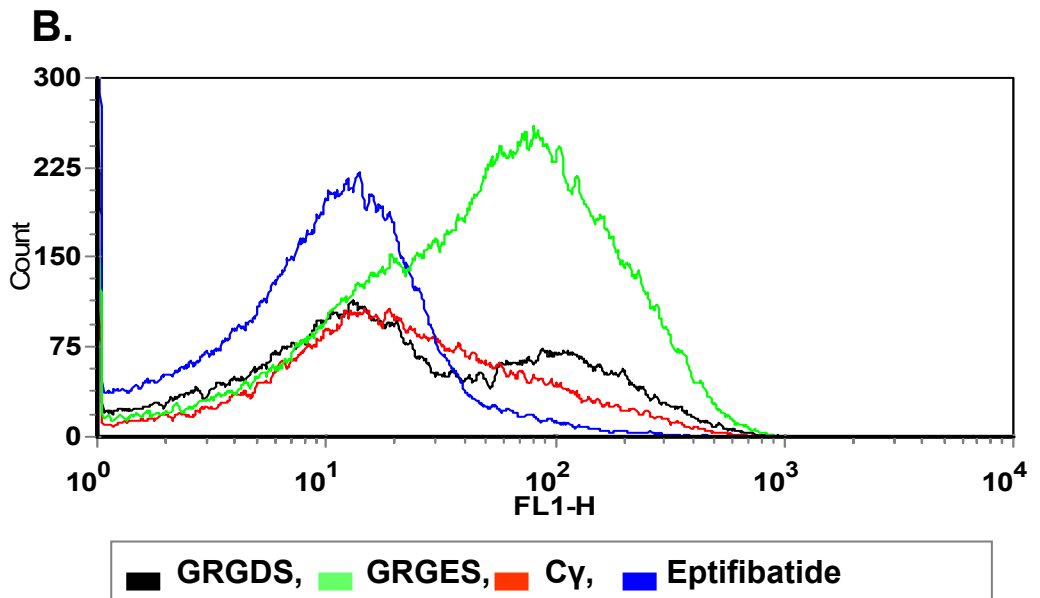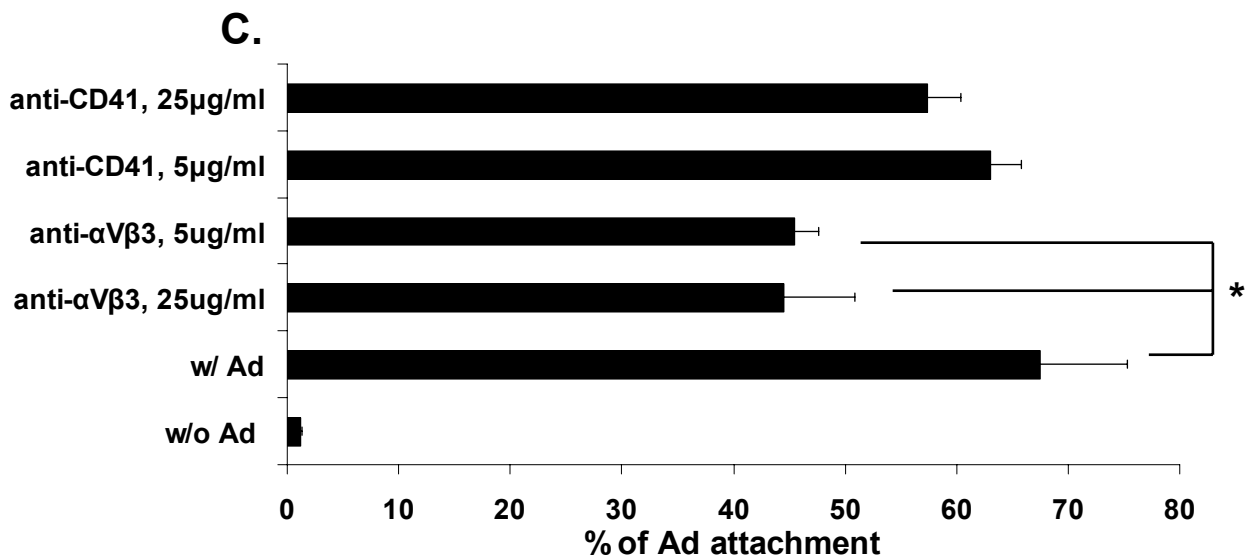

Supplement: MOESM5 [file 9608406]
